# Supplementary material for: Transcriptional response to West Nile virus infection in the zebra finch (Taeniopygia guttata)
Source: R Soc Open Sci. 2017 Jun 28;4(6):170296. doi: 10.1098/rsos.170296 (PMC5493925; doi:10.1098/rsos.170296)
Supplement: Supplemental Table S4 [file rsos170296supp3.xlsx]

## Sheet: CvWNV
			GO term	Description	P-value	FDR q-value	Enrichment (N, B, n, b)			Enrichment (N, B, n, b)Êis defined as follows:
			GO:0009615	response to virus	5.78e-07	0.00774	5.34 (10152,96,317,16)			N - is the total number of genes
			GO:0051276	chromosome organization	2.81e-06	0.0188	1.97 (10152,280,1047,57)			B - is the total number of genes associated with a specific GO term
			GO:1903047	mitotic cell cycle process	7.78e-06	0.0347	1.69 (10152,570,908,86)			n - is the number of genes in the top of the user's input list or in the target set when appropriate
			GO:0034723	DNA replication-dependent nucleosome organization	1.46e-05	0.0488	14.27 (10152,6,593,5)			b - is the number of genes in the intersection
			GO:0006335	DNA replication-dependent nucleosome assembly	1.46e-05	0.039	14.27 (10152,6,593,5)			Enrichment = (b/n) / (B/N)

## Sheet: Cv2dpi
GO term	Description	P-value	FDR q-value	Enrichment (N, B, n, b)			Enrichment (N, B, n, b) is defined as follows:
GO:0044425	membrane part	1.08e-10	1.77e-07	1.29 (10152,3408,1052,455)			N - is the total number of genes
GO:0098800	inner mitochondrial membrane protein complex	1.4e-09	1.15e-06	3.73 (10152,75,1052,29)			B - is the total number of genes associated with a specific GO term
GO:0044459	plasma membrane part	4.85e-09	2.66e-06	1.98 (10152,1362,312,83)			n - is the number of genes in the top of the user's input list or in the target set when appropriate
GO:0031224	intrinsic component of membrane	1.23e-08	4.04e-06	1.35 (10152,2539,883,299)			b - is the number of genes in the intersection
GO:0098798	mitochondrial protein complex	9.87e-09	4.06e-06	3.32 (10152,90,1052,31)			Enrichment = (b/n) / (B/N)
GO:0005886	plasma membrane	2.53e-08	6.93e-06	1.43 (10152,2142,747,225)
GO:0098590	plasma membrane region	9.48e-08	2.23e-05	2.62 (10152,553,294,42)
GO:0016021	integral component of membrane	1.68e-07	2.76e-05	1.33 (10152,2475,883,287)
GO:0031226	intrinsic component of plasma membrane	1.53e-07	2.79e-05	2.28 (10152,701,337,53)
GO:0016323	basolateral plasma membrane	1.38e-07	2.84e-05	3.69 (10152,110,625,25)
GO:0005887	integral component of plasma membrane	1.95e-07	2.92e-05	2.31 (10152,666,337,51)
GO:0044421	extracellular region part	4.42e-07	6.05e-05	1.33 (10152,2153,1012,285)
GO:0005753	mitochondrial proton-transporting ATP synthase complex	5.19e-07	6.09e-05	7.29 (10152,15,929,10)
GO:0045259	proton-transporting ATP synthase complex	5.19e-07	6.56e-05	7.29 (10152,15,929,10)
GO:1903561	extracellular vesicle	6.62e-07	6.8e-05	1.38 (10152,1680,1012,231)
GO:0070062	extracellular exosome	7.14e-07	6.9e-05	1.38 (10152,1673,1012,230)
GO:0043230	extracellular organelle	6.62e-07	7.26e-05	1.38 (10152,1680,1012,231)
GO:0044455	mitochondrial membrane part	8.62e-07	7.87e-05	2.67 (10152,123,1052,34)
GO:0098803	respiratory chain complex	1.88e-06	0.000162	3.87 (10152,45,1048,18)
GO:0016469	proton-transporting two-sector ATPase complex	4.29e-06	0.000352	5.25 (10152,25,929,12)
GO:1990204	oxidoreductase complex	5.46e-06	0.000427	3.28 (10152,62,1048,21)
GO:0016020	membrane	1.4e-05	0.00104	1.16 (10152,4414,1051,532)
GO:0031982	vesicle	1.53e-05	0.00109	1.28 (10152,2216,1012,283)
GO:0022891	substrate-specific transmembrane transporter activity	6.68e-07	0.00131	1.79 (10152,516,935,85)
GO:0005743	mitochondrial inner membrane	2.21e-05	0.00151	1.86 (10152,291,1049,56)
GO:0015075	ion transmembrane transporter activity	4.18e-07	0.00164	1.84 (10152,479,935,81)
GO:0006811	ion transport	3.86e-07	0.00172	1.66 (10152,733,935,112)
GO:0007154	cell communication	2.88e-07	0.00193	2.39 (10152,388,503,46)
GO:0009150	purine ribonucleotide metabolic process	9.34e-07	0.00313	2.35 (10152,175,1011,41)
GO:1901135	carbohydrate derivative metabolic process	2.45e-07	0.00328	1.75 (10152,549,1014,96)
GO:0022857	transmembrane transporter activity	3.58e-06	0.00468	1.70 (10152,569,935,89)
GO:1902600	hydrogen ion transmembrane transport	3.21e-06	0.00477	3.28 (10152,65,1048,22)
GO:0009259	ribonucleotide metabolic process	2.88e-06	0.00482	2.23 (10152,189,1011,42)
GO:0006818	hydrogen transport	2.53e-06	0.00484	2.91 (10152,90,1048,27)
GO:0070268	cornification	3.64e-06	0.00487	19.37 (10152,24,131,6)
GO:0016324	apical plasma membrane	7.67e-05	0.00504	3.48 (10152,169,276,16)
GO:0007501	mesodermal cell fate specification	4.27e-06	0.00519	75.76 (10152,3,134,3)
GO:0044763	single-organism cellular process	2.46e-06	0.0055	1.18 (10152,5390,689,432)
GO:0006163	purine nucleotide metabolic process	2.18e-06	0.00583	2.26 (10152,187,1011,42)
GO:0034220	ion transmembrane transport	6.3e-06	0.00703	1.76 (10152,463,932,75)
GO:0003779	actin binding	7.57e-06	0.00743	2.72 (10152,269,403,29)
GO:0015078	hydrogen ion transmembrane transporter activity	1.32e-05	0.00866	3.13 (10152,65,1048,21)
GO:0098632	protein binding involved in cell-cell adhesion	1.13e-05	0.00884	8.83 (10152,23,400,8)
GO:0006091	generation of precursor metabolites and energy	8.78e-06	0.00905	2.21 (10152,171,1048,39)
GO:0031966	mitochondrial membrane	0.000157	0.00994	1.64 (10152,413,1049,70)
GO:0005911	cell-cell junction	0.000172	0.0104	2.49 (10152,255,400,25)
GO:0023052	signaling	2.11e-05	0.0113	2.36 (10152,291,503,34)
GO:0046034	ATP metabolic process	1.88e-05	0.0114	3.10 (10152,71,969,21)
GO:0022900	electron transport chain	2.22e-05	0.0114	3.12 (10152,62,1048,20)
GO:0009653	anatomical structure morphogenesis	1.72e-05	0.0115	1.69 (10152,811,600,81)
GO:0042474	middle ear morphogenesis	1.99e-05	0.0116	35.50 (10152,13,88,4)
GO:0044699	single-organism process	1.49e-05	0.0117	1.18 (10152,6318,398,293)
GO:0044700	single organism signaling	1.83e-05	0.0117	2.37 (10152,289,503,34)
GO:0015992	proton transport	2.1e-05	0.0117	2.75 (10152,88,1048,25)
GO:0006820	anion transport	1.6e-05	0.0119	1.99 (10152,317,806,50)
GO:0030057	desmosome	0.000202	0.0119	12.34 (10152,17,242,5)
GO:0022904	respiratory electron transport chain	1.71e-05	0.012	3.18 (10152,61,1048,20)
GO:0019693	ribose phosphate metabolic process	1.36e-05	0.0122	2.11 (10152,200,1011,42)
GO:0072521	purine-containing compound metabolic process	1.46e-05	0.0122	2.06 (10152,214,1011,44)
GO:0031424	keratinization	1.31e-05	0.0125	10.47 (10152,18,377,7)
GO:0005471	ATP:ADP antiporter activity	4.75e-05	0.0133	203.04 (10152,2,50,2)
GO:0008324	cation transmembrane transporter activity	4.09e-05	0.0134	1.81 (10152,356,932,59)
GO:0005913	cell-cell adherens junction	0.000236	0.0134	4.50 (10152,62,400,11)
GO:0002934	desmosome organization	2.81e-05	0.0139	31.00 (10152,10,131,4)
GO:0008509	anion transmembrane transporter activity	3.91e-05	0.0139	2.32 (10152,174,806,32)
GO:0015207	adenine transmembrane transporter activity	4.75e-05	0.0144	203.04 (10152,2,50,2)
GO:0016459	myosin complex	0.000263	0.0144	4.63 (10152,37,592,10)
GO:0060089	molecular transducer activity	3.86e-05	0.0151	1.71 (10152,609,713,73)
GO:0004872	receptor activity	3.86e-05	0.0168	1.71 (10152,609,713,73)
GO:0098631	protein binding involved in cell adhesion	3.29e-05	0.0184	7.81 (10152,26,400,8)
GO:0019866	organelle inner membrane	0.000346	0.0184	1.70 (10152,319,1049,56)
GO:0005747	mitochondrial respiratory chain complex I	0.000385	0.0186	3.81 (10152,28,1048,11)
GO:0015711	organic anion transport	3.92e-05	0.0187	2.07 (10152,249,806,41)
GO:0016655	oxidoreductase activity, acting on NAD(P)H, quinone or similar compound as acceptor	3.83e-05	0.0188	4.06 (10152,31,1048,13)
GO:0009144	purine nucleoside triphosphate metabolic process	4.12e-05	0.019	2.67 (10152,94,1011,25)
GO:0008514	organic anion transmembrane transporter activity	7.25e-05	0.019	2.70 (10152,112,806,24)
GO:0048729	tissue morphogenesis	5.01e-05	0.0192	3.49 (10152,241,205,17)
GO:0045271	respiratory chain complex I	0.000385	0.0192	3.81 (10152,28,1048,11)
GO:0042776	mitochondrial ATP synthesis coupled proton transport	4.9e-05	0.0193	6.24 (10152,14,929,8)
GO:0031103	axon regeneration	4.38e-05	0.0195	29.60 (10152,14,98,4)
GO:0009167	purine ribonucleoside monophosphate metabolic process	5.25e-05	0.0195	2.65 (10152,99,969,25)
GO:0042108	positive regulation of cytokine biosynthetic process	4.85e-05	0.0197	6.38 (10152,31,462,9)
GO:0030964	NADH dehydrogenase complex	0.000385	0.0198	3.81 (10152,28,1048,11)
GO:0015853	adenine transport	4.75e-05	0.0199	203.04 (10152,2,50,2)
GO:0009205	purine ribonucleoside triphosphate metabolic process	4.7e-05	0.0203	2.71 (10152,89,1011,24)
GO:0003954	NADH dehydrogenase activity	0.000107	0.022	4.26 (10152,25,1048,11)
GO:0015297	antiporter activity	9e-05	0.0221	11.86 (10152,48,107,6)
GO:0009126	purine nucleoside monophosphate metabolic process	6.21e-05	0.0225	2.62 (10152,100,969,25)
GO:0050136	NADH dehydrogenase (quinone) activity	0.000107	0.0232	4.26 (10152,25,1048,11)
GO:0014704	intercalated disc	0.000508	0.0238	7.91 (10152,25,308,6)
GO:0006954	inflammatory response	6.81e-05	0.024	2.74 (10152,193,441,23)
GO:0022892	substrate-specific transporter activity	0.000123	0.0242	1.54 (10152,655,935,93)
GO:0008137	NADH dehydrogenase (ubiquinone) activity	0.000107	0.0246	4.26 (10152,25,1048,11)
GO:0005345	purine nucleobase transmembrane transporter activity	0.000136	0.0255	135.36 (10152,3,50,2)
GO:0005391	sodium:potassium-exchanging ATPase activity	0.000151	0.027	34.41 (10152,5,177,3)
GO:0034395	regulation of transcription from RNA polymerase II promoter in response to iron	8.3e-05	0.0285	109.16 (10152,2,93,2)
GO:0030054	cell junction	0.000649	0.0296	1.72 (10152,761,410,53)
GO:0006754	ATP biosynthetic process	0.000105	0.0321	4.75 (10152,23,929,10)
GO:0007267	cell-cell signaling	0.000103	0.0322	2.32 (10152,261,503,30)
GO:0000276	mitochondrial proton-transporting ATP synthase complex, coupling factor F(o)	0.000725	0.0322	10.13 (10152,6,668,4)
GO:0044291	cell-cell contact zone	0.000747	0.0323	6.24 (10152,37,308,7)
GO:0009611	response to wounding	0.0001	0.0327	5.23 (10152,122,175,11)
GO:0016337	single organismal cell-cell adhesion	0.000103	0.0328	2.14 (10152,151,1039,33)
GO:0031102	neuron projection regeneration	0.000111	0.0329	24.37 (10152,17,98,4)
GO:0030855	epithelial cell differentiation	9.94e-05	0.0333	5.32 (10152,175,109,10)
GO:0009161	ribonucleoside monophosphate metabolic process	0.000119	0.0345	2.48 (10152,110,969,26)
GO:0009199	ribonucleoside triphosphate metabolic process	0.000123	0.0351	2.56 (10152,94,1011,24)
GO:0098609	cell-cell adhesion	0.000129	0.0359	2.47 (10152,231,463,26)
GO:0006863	purine nucleobase transport	0.000136	0.0373	135.36 (10152,3,50,2)
GO:0061564	axon development	0.000141	0.0377	23.02 (10152,18,98,4)
GO:0099516	ion antiporter activity	0.000226	0.0386	13.55 (10152,35,107,5)
GO:0090533	cation-transporting ATPase complex	0.000955	0.0402	21.51 (10152,8,177,3)
GO:0047394	glycerophosphoinositol inositolphosphodiesterase activity	0.000296	0.0446	3,384.00 (10152,1,3,1)
GO:0008556	potassium-transporting ATPase activity	0.000327	0.0458	28.68 (10152,6,177,3)
GO:0051015	actin filament binding	0.000293	0.0459	2.85 (10152,100,676,19)
GO:0038023	signaling receptor activity	0.000317	0.0461	1.71 (10152,483,713,58)
GO:0005215	transporter activity	0.000286	0.0468	1.91 (10152,760,301,43)
GO:0045402	regulation of interleukin-4 biosynthetic process	0.000182	0.0479	21.97 (10152,3,462,3)
GO:0019637	organophosphate metabolic process	0.000194	0.049	1.52 (10152,599,1035,93)
GO:0032502	developmental process	0.000192	0.0495	1.28 (10152,2783,609,214)

## Sheet: Cv4dpi
GO term	Description	P-value	FDR q-value	Enrichment (N, B, n, b)				Enrichment (N, B, n, b) is defined as follows:
GO:0009615	response to virus	9.64e-08	0.00129	19.23 (10152,96,44,8)				N - is the total number of genes
GO:0051607	defense response to virus	3.75e-07	0.00167	51.27 (10152,55,18,5)				B - is the total number of genes associated with a specific GO term
GO:0060337	type I interferon signaling pathway	6.09e-07	0.00204	24.25 (10152,16,157,6)				n - is the number of genes in the top of the user's input list or in the target set when appropriate
GO:0051707	response to other organism	3.56e-07	0.00239	11.73 (10152,177,44,9)				b - is the number of genes in the intersection
GO:0098586	cellular response to virus	1.32e-06	0.00253	70.99 (10152,13,44,4)				Enrichment = (b/n) / (B/N)
GO:0035455	response to interferon-alpha	1.16e-06	0.0026	230.73 (10152,11,12,3)
GO:0045087	innate immune response	1.05e-06	0.00281	21.97 (10152,154,18,6)
GO:0048525	negative regulation of viral process	1.9e-06	0.00318	37.77 (10152,48,28,5)
GO:0039528	cytoplasmic pattern recognition receptor signaling pathway in response to virus	2.72e-06	0.00405	138.44 (10152,5,44,3)
GO:0043207	response to external biotic stimulus	3.11e-06	0.00416	7.85 (10152,294,44,10)
GO:0000226	microtubule cytoskeleton organization	4.77e-06	0.0058	2.80 (10152,208,488,28)
GO:0009607	response to biotic stimulus	5.44e-06	0.00607	7.42 (10152,311,44,10)
GO:0043900	regulation of multi-organism process	6.03e-06	0.00621	17.01 (10152,199,18,6)
GO:0006952	defense response	7.96e-06	0.00762	6.31 (10152,402,44,11)
GO:0043901	negative regulation of multi-organism process	1.22e-05	0.00962	26.27 (10152,69,28,5)
GO:0098542	defense response to other organism	1.08e-05	0.00963	17.97 (10152,113,30,6)
GO:0050792	regulation of viral process	1.16e-05	0.00967	15.21 (10152,143,28,6)
GO:0002831	regulation of response to biotic stimulus	1.31e-05	0.00976	46.73 (10152,79,11,4)
GO:0043903	regulation of symbiosis, encompassing mutualism through parasitism	1.79e-05	0.0126	14.04 (10152,155,28,6)
GO:0032647	regulation of interferon-alpha production	2.69e-05	0.018	31.55 (10152,11,117,4)
GO:0031012	extracellular matrix	1.11e-05	0.0182	3.21 (10152,260,268,22)
GO:0032727	positive regulation of interferon-alpha production	2.93e-05	0.0187	76.91 (10152,9,44,3)
GO:0032480	negative regulation of type I interferon production	3.69e-05	0.0206	34.18 (10152,27,44,4)
GO:0034344	regulation of type III interferon production	3.67e-05	0.0214	230.73 (10152,2,44,2)
GO:0033262	regulation of nuclear cell cycle DNA replication	4.14e-05	0.0222	14.50 (10152,9,389,5)
GO:0039530	MDA-5 signaling pathway	3.67e-05	0.0223	230.73 (10152,2,44,2)
GO:0045824	negative regulation of innate immune response	5.05e-05	0.026	5.69 (10152,19,845,9)
GO:0032648	regulation of interferon-beta production	5.42e-05	0.0269	4.27 (10152,30,950,12)
GO:0050687	negative regulation of defense response to virus	6.2e-05	0.0296	67.98 (10152,16,28,3)
GO:0060664	epithelial cell proliferation involved in salivary gland morphogenesis	0.000102	0.0457	35.75 (10152,4,213,3)
GO:0044772	mitotic cell cycle phase transition	9.95e-05	0.0459	2.53 (10152,190,527,25)
GO:1902576	negative regulation of nuclear cell cycle DNA replication	0.000109	0.047	26.10 (10152,3,389,3)
GO:0050688	regulation of defense response to virus	0.000112	0.047	27.36 (10152,53,28,4)
GO:0044770	cell cycle phase transition	0.000121	0.0478	2.50 (10152,193,527,25)
GO:0006955	immune response	0.00012	0.0486	10.22 (10152,331,18,6)
GO:0032479	regulation of type I interferon production	0.000129	0.0494	16.25 (10152,71,44,5)

## Sheet: 2dpiv4dpi
GO term	Description	P-value	FDR q-value	Enrichment (N, B, n, b)			Enrichment (N, B, n, b) is defined as follows:
GO:0098800	inner mitochondrial membrane protein complex	6.31e-06	0.0104	3.09 (10152,75,1008,23)			N - is the total number of genes
GO:0098798	mitochondrial protein complex	5.36e-05	0.044	2.69 (10152,90,1008,24)			B - is the total number of genes associated with a specific GO term
							n - is the number of genes in the top of the user's input list or in the target set when appropriate
							b - is the number of genes in the intersection
							Enrichment = (b/n) / (B/N)
